# Supplementary material for: A checkpoint for autoreactivity in human IgM+ memory B cell development
Source: PubMed Central journal article supplement — J Exp Med. 2006 Feb 20;203(2):393–400. doi: 10.1084/jem.20052033 (PMC2118214; doi:10.1084/jem.20052033), 2006-02-20
Supplement: jexpmed_jem.20052033_6.xls [file jexpmed_jem.20052033_6.xls]

## Sheet: Tabelle1
		Table S6. Repertoire and reactivity of antibodies from mature naive B cells of JH
		Ig	Heavy						Light				Reactivity						Whole bacteria					Vaccine
		m-JH	VH	D	RF	JH	CDR3 (aa)	Length	Vk	Jk	CDR3 (aa)	Length	ssDNA	dsDNA	LPS	Insulin	ANA	mSpA	Staph(A-)	S.pyo	S.pneumo	E.fae	E.coli	PneVax	PedHIB	Meno
		m-JH.1 D4	7-81	3-10	3	4	GDITMVRVTLADY	13	3-20	1	QQYGSSAWT	9	/	/	/	/	ND	/	/	/	/	/	/	/	/	/
		m-JH.1 D12#	4-4	3-10	1	6	GFGELYYYGMDV	14	3-15	2	QQYNNWPPMYT	11
		m-JH.1 E3	4-34	1-26	2	6	GSYRPPLVYYYYGMDV	16	3-20	4	QQYGSSPLT	9	/	/	/	/	/	/	/	/	/	/	/	/	/	/
		m-JH.1 F5	3-30	4-17	3	4	DLFTVTHFDY	10	3-15	4	QQYNNWPPLT	10	/	/	/	/	/	X	/	/	/	/	/	/	/	/
		m-JH.1 F8	3-21	3-22	2	6	VGAVAGGVDYYYYYGMDV	18	2D-28	4	MQALQTLALT	10	X	X	X	/	X	/	/	/	/	/	/	/	/	/
		m-JH.1 G8	3-48	1-26	2	6	LSGSYSNYYYGMDV	14	1D-12	4	QQANSFPLT	9	/	/	/	/	/	/	/	X	/	/	/	/	/	/
		m-JH.1 G10	3-23	2-2	3	4	EGPFDIVVVPAALDFDY	17	3-15	2	QQYNNWPSYT	10	/	/	/	/	/	X	/	/	/	/	/	/	/	/
		m-JH.1 H5	4-59	/	/	4	LGKMDLSPFDY	11	3-20	2	QQYGSSPRT	9	/	/	/	/	/	/	/	/	/	/	/	/	/	/
		m-JH.1 H11	3-33	/	/	6	DHSVTPYLYYYYGMDV	16	2D-28	1	MQALQTPRT	9	X	X	X	/	/	X	X	X	/	X	X	/	/	/
		m-JH.2 A2	3-74	1-26	1	6	DPVWELFSAASGGAHYYYGMDV	22	1D-39	2	QQSYSTPPT	9	/	/	/	/	X	X	/	/	/	/	/	/	/	/
		m-JH.2 A8	3-7	6-19	1	1	DLSGQWLVRGRH	12	1-8	4	QQYYSYPLT	9	X	X	X	X	X	X	X	X	/	/	X	X	X	X
		m-JH.2 A9	4-31	/	/	5	DTAAETGNNWFDP	13	3-11	5	QQRSNWPIT	9	/	/	/	/	/	/	/	/	/	/	/	/	/	/
		m-JH.2 A11	4-61	/	/	4	DGKGLGYFDY	10	4-1	1	QQYYSTPWT	9	/	/	/	/	/	/	/	/	/	/	/	/	/	/
		m-JH.2 A12#	3-9	2-21	2	3	DTRGELRGGAFDI	13	1D-8	1	QQYYSFPRT	9
		m-JH.2 B5	7-81	3-22	2	4	VPPPNYYATVEEEYYFDY	18	3-20	4	QQYGSSPRLT	10	/	/	/	/	ND	/	/	/	/	/	/	/	/	/
		m-JH.2 C3	3-23	3-10	1	5	GAAALLWFGEI	11	3-20	2	QQYGSSPMYT	10	/	/	/	/	/	X	/	/	/	/	/	/	/	/
		m-JH.2 C6	3-23	3-22	2	4	VRGLRPADYYFDY	13	1-9	2	QQLNSYPYT	9	/	/	/	/	/	X	/	/	/	/	/	/	/	/
		m-JH.2 C10	4-59	3-22	2	4	GPYYYDFDY	9	3-15	1	QQYNNWPRT	9	/	/	/	/	/	/	/	/	/	/	/	/	/	/
		m-JH.2 D6	3-49	3-10	2	6	SDYGSGSGKAYYYYGMDV	18	1-17	1	LQHNSYPWT	9	/	/	/	/	/	X	X	X	X	X	X	X	X	X
		m-JH.2 D7	3-48	/	/	6	EYRLARYYYYGMDV	14	3-15	2	QQYNNWPYT	9	/	/	/	/	X	X	X	X	X	X	X	X	X	X
		m-JH.2 E3	1-18	1-20	2	5	EPPGPNDVRNDP	12	3-20	4	QQYGSSPFA	9	/	/	/	/	/	/	/	/	/	/	/	/	/	/
		m-JH.2 E5	4-39	6-6	3	6	HPRIAAQVYGMDV	13	1D-39	4	QQSYSTLPLT	10	/	/	/	/	X	/	/	/	/	/	/	/	/	/
		m-JH.2 E8	3-9	6-19	2	5	GSHTSSSGWYDY	12	3-15	2	QQYNNWPMYT	10	/	/	/	/	/	/	/	/	/	/	/	/	/	/
		m-JH.2 E10#	3-48	4-23	2	4	DRPDYGLVRAIDY	13	3-11	4	QQRRTWPPT	9
		m-JH.2 F3	7-81	2-15	3	5	AEDIVVVVAAAGFDP	15	3-20	4	QQYGSSPRT	9	/	/	/	/	/	/	/	/	/	/	/	/	/	/
		m-JH.2 F9	5-51	6-13	2	3	QYSSRLRGGGAFDI	14	3-20	4	QQYGSSLT	8	/	/	/	/	/	/	/	/	/	/	/	/	/	/
		m-JH.2 H12#	3-9	1-26	2	6	DISEGSYYGMDV	12	2D-28	1	MQALQTPWT	9
		m-JH	VH	D	RF	JH	CDR3 (aa)	Length	Vl	Jl	CDR3 (aa)	Length	ssDNA	dsDNA	LPS	Insulin	ANA	mSpA	Staph(A-)	S.pyo	S.pneumo	E.fae	E.coli	PneVax	PedHIB	Meno
		m-JH.1 B11	3-23	3-10	3	6	GATMVRGSLGMDV	13	2-14	3	SSYTSSSTWV	10	/	/	/	/	/	X	/	/	/	/	/	/	/	/
		m-JH.1 C12	4-59	2-2	3	6	ASPAAIGLPYYYYGMDV	17	1-40	2	QSYDSSLSGFVV	12	/	/	/	/	/	/	/	/	/	/	/	/	/	/
		m-JH.1 D2	1-18	4-17	2	4	ETGNSDYWAAPLDY	14	2-8	1	SSYAGSNNPYV	11	/	/	/	/	/	/	/	/	/	/	/	/	/	/
		m-JH.1 D10	4-59	6-13	3	4	HLPRIAAAAYDY	12	2-14	1	SSYTSSSTYV	10	/	/	/	/	/	/	/	/	/	/	/	/	/	/
		m-JH.1 F6	1-8	1-20	1	6	GMGLEPYSTIYGMDV	15	2-14	2	SSYTSSSTLDVV	12	/	/	/	/	/	/	/	/	/	/	/	/	/	/
		m-JH.1 H6	3-9	6-13	2	4	DMLRLSYSSSWYGAFDY	17	2-11	3	CSYAGSYTLGV	11	/	/	/	/	/	/	/	/	/	/	/	/	/	/
		m-JH.1 H12#	4-34	3-22	2	1	GLTGYDSNYIQH	12	3-25	3	QSADSSGTYSWV	12
		m-JH.2 B12	3-23	6-19	2	4	DPLILATLGSSGFGPFFDY	19	2-14	2	SSYTSSSTLYVV	12	/	/	/	/	/	X	/	/	/	/	/	/	/	/
		m-JH.2 C8#	1-3	1-26	3	4	VGRVGATTHWDY	12	2-14	1	SSYTSSSTPLYV	12
		m-JH.2 C12	4-4	/	/	6	GLTGSRQTPYYYYGMDV	17	2-14	2	SSYTSSSTLYVV	12	/	/	/	/	/	/	/	/	/	/	/	/	/	/
		m-JH.2 D8	3-21	3-9	2	4	DLFGGVDILTYFDY	14	6-57	3	QSYDSSNHRV	10	/	/	/	/	/	/	/	/	/	/	/	/	/	/
		m-JH.2 E6	3-33	2-2	2	4	AYCSSTSCYMRDY	13	2-11	2	CSYAGSSVV	9	/	/	/	/	/	X	/	/	/	/	/	/	/	/
		m-JH.2 F6	1-2	6-19	2	4	DPPASYSSGWYGKLGY	16	2-14	2	SSYTSSSTLDGV	12	/	/	/	/	/	/	/	/	/	/	/	/	/	/
		m-JH.2 G12	5-51	3-22	2	5	GRSYYDSSGYYLQAGWFDP	19	2-14	2	SSYTSSSTLYVV	12	/	/	/	/	X	/	/	/	/	/	/	/	/	/
		m-JH.2 H4	4-59	3-22	2	2	LLTGADDSSGYYDWYFDL	18	1-40	1	QSYDSSLSGRHV	12	/	/	/	/	/	/	/	/	/	/	/	/	/	/
		m-JH.2 H12#							2-14	2	SSYTSSSTLYVV	12
		RF, reading frame; #, antibody was not expressed; X, reactive in ELISA; /, nonreactive in ELISA; ND, not determined
